# Supplementary material for: Post-fire recolonization of dry deciduous forests by lemurs in northwestern Madagascar
Source: Research Square preprint supplement (doi:10.21203/rs.3.rs-5735404/v1), 2025-01-05
Supplement: Supplementary file 1 [file 753232d7a700e6fda5bc0356.docx]

**Post-fire recolonization of dry deciduous forests by lemurs in northwestern Madagascar**

Naina Ratsimba Rabemananjara1*, Misa Miaritiana Rasolozaka1, Marie Odile Ravolanirina2, Rogula Marivola2, Seheno Harilala Randriamiarantsoa3, Romule Rakotondravony2, Hanta Razafindraibe3, Dominik Schüßler4, Ute Radespiel1*

1Institute of Zoology, University of Veterinary Medicine Hannover, Hannover, Germany

2Mention Sciences de la Vie et de l’Environnement, Faculté des Sciences, de Technologies et de l’Environnement, University of Mahajanga, Mahajanga, Madagascar.

3Mention of Zoology and Animal Biodiversity, University of Antananarivo, Ambohitsaina, Madagascar

4Institute of Biology and Zoology, University of Hildesheim, Hildesheim, Germany

***** Corresponding author:** Ute Radespiel**,** Naina Ratsimba Rabemananjara

Emails of corresponding authors: [ute.radespiel@tiho-hannover.de](mailto:ute.radespiel@tiho-hannover.de), [Naina.Ratsimba.Rabemananjara@tiho-hannover.de](mailto:Naina.Ratsimba.Rabemananjara@tiho-hannover.de)

**Supplementary tables**

**Table S1** List all transect partitions with the years when fires occurred in them, length, the burn status, elevation, type of terrain, and the position of each partition along the transect. Sites are sorted by the date of visit, from the oldest to the most recent. NA: not available (i.e., unburnt)

| Site | Years of fire | Partition  No. | Length (m) | Transect zones | Transect partition | Elevation (m) | Terrain |
| --- | --- | --- | --- | --- | --- | --- | --- |
| 1 | NA | 1 | 500 | Unburnt | TLU000-TLU500 | 196 | Plateau |
| 1 | 2021 | 2 | 200 | Burnt | TLT000-TLT200 | 200 | Plateau |
| 1 | 2021 | 3 | 500 | Burnt | TLB000-TLB500 | 205 | Plateau |
| 9 | NA | 1 | 500 | Unburnt | TLU000-TLU500 | 158 | Slope |
| 9 | 2000 | 2 | 200 | Burnt | TLT000-TLT200 | 175 | Slope |
| 9 | 2000 | 3 | 500 | Burnt | TLB000-TLB500 | 190 | Plateau |
| 4 | 1987, 1989, 1992, 1995, 1998 and 1999 | 1 | 110 | Burnt | TLU000-TLU110 | 60 | Valley |
| 4 | 1987, 1992, 1995, 1998 and 1999 | 2 | 100 | Burnt | TLU120-TLU220 | 60 | Valley |
| 4 | 1987, 1992, 1995 and 1998 | 3 | 140 | Burnt | TLU230-TLU360 | 60 | Valley |
| 4 | 1987, 1992 and 1995 | 4 | 150 | Burnt | TLU370-TLU500 | 56 | Valley |
| 4 | 1987,1992, 1995,1999 and 2017 | 5 | 200 | Burnt | TLT000-TLT200 | 80 | Valley |
| 4 | 1987, 1992, 1995, 1998, 1999 and 2017 | 6 | 50 | Burnt | TLB000-TLB050 | 80 | Valley |
| 4 | 1987, 1992, 1995, 1999 and 2017 | 7 | 450 | Burnt | TLB060-TLB500 | 80 | Valley |
| 5 | 1988,1998 and 2017 | 1 | 60 | Burnt | TLU000-TLU060 | 120 | Plateau |
| 5 | 1988 and 1998 | 2 | 240 | Burnt | TLU070-TLU300 | 120 | Plateau |
| 5 | 1998 and 2017 | 3 | 200 | Burnt | TLT000-TLT200 | 124 | Plateau |
| 5 | 1988,1998 and 2017 | 4 | 30 | Burnt | TLB000-TLB030 | 122 | Plateau |
| 5 | 1998 and 2017 | 5 | 470 | Burnt | TLB040-TLB500 | 122 | Plateau |
| 8 | NA | 1 | 500 | Unburnt | TLU000-TLU500 | 152 | Plateau |
| 8 | 1998, 2002, 2006, 2010 and 2017 | 2 | 200 | Burnt | TLT000-TLT200 | 157 | Plateau |
| 8 | 1998, 2002, 2006, 2010 and 2017 | 3 | 200 | Burnt | TLB000-TLB200 | 160 | Plateau |
| 8 | 1998, 2002, 2006 and 2017 | 4 | 300 | Burnt | TLB210-TLB500 | 160 | Plateau |
| 11 | NA | 1 | 500 | Unburnt | TLU000-TLU500 | 100 | Valley |
| 11 | 1995 and 1998 | 2 | 200 | Burnt | TLT000-TLT200 | 96 | Valley |
| 11 | 1995 and 1998 | 3 | 500 | Burnt | TLB000-TLB500 | 101 | Valley |
| 15 | 1988 | 1 | 500 | Burnt | TLU000-TLU500 | 105 | Valley |
| 15 | 1988 and 1992 | 2 | 200 | Burnt | TLT000-TLT200 | 96 | Valley |
| 15 | 1988 and 1992 | 3 | 500 | Burnt | TLB000-TLB500 | 105 | Valley |
| 6 | NA | 1 | 500 | Unburnt | TLU000-TLU500 | 311 | Plateau |
| 6 | 1998 and 2018 | 2 | 200 | Burnt | TLT000-TLT200 | 301 | Plateau |
| 6 | 1998 and 2018 | 3 | 330 | Burnt | TLB000-TLB330 | 307 | Plateau |
| 6 | 1986, 1998 and 2018 | 4 | 170 | Burnt | TLB340-TLB500 | 307 | Plateau |
| 12 | NA | 1 | 160 | Unburnt | TLU350-TLU500 | 330 | Plateau |
| 12 | 1986 | 2 | 340 | Burnt | TLU00-TLU340 | 332 | Plateau |
| 12 | 1986 and 1998 | 3 | 200 | Burnt | TLT000-TLT200 | 340 | Plateau |
| 12 | 1986 and 1998 | 4 | 500 | Burnt | TLB000-TLB500 | 340 | Plateau |
| 2 | 1988 and 1999 | 1 | 500 | Burnt | TLU000-TLU500 | 198 | Plateau |
| 2 | 1988 and 1999 | 2 | 200 | Burnt | TLT000-TLT200 | 190 | Plateau |
| 2 | 1988 and 1999 | 3 | 500 | Burnt | TLB000-TLB500 | 193 | Plateau |
| 19 | > 1986 | 1 | 500 | Burnt | TLU000-TLU500 | 316 | Plateau |
| 19 | NA | 2 | 200 | Unburnt | TLT000-TLT500 | 324 | Plateau |
| 19 | NA | 3 | 500 | Unburnt | TLB000-TLB500 | 325 | Plateau |
| 21 | NA | 1 | 500 | Unburnt | TLU000-TLU500 | 313 | Plateau |
| 21 | 2016 | 2 | 200 | Burnt | TLT000-TLT200 | 309 | Plateau |
| 21 | 2016 | 3 | 500 | Burnt | TLB000-TLB500 | 307 | Plateau |
| 30 | NA | 1 | 500 | Unburnt | TLU000-TLU500 | 331 | Plateau |
| 30 | 2017 | 2 | 200 | Burnt | TLT000-TLT200 | 332 | Plateau |
| 30 | 2017 | 3 | 500 | Burnt | TLB000-TLB500 | 334 | Plateau |
| 24 | NA | 1 | 500 | Unburnt | TLU000-TLU500 | 238 | Plateau |
| 24 | 1998 and 2022 | 2 | 200 | Burnt | TLT000-TLT200 | 239 | Plateau |
| 24 | 1998 and 2022 | 3 | 500 | Burnt | TLB000-TLB500 | 237 | Plateau |
| 16 | NA | 1 | 500 | Unburnt | TLU000-TLU500 | 168 | Slope |
| 16 | 1988 | 2 | 200 | Burnt | TLT000-TLT200 | 172 | Slope |
| 16 | 1988 | 3 | 500 | Burnt | TLB000-TLB500 | 169 | Slope |
| 14 | NA | 1 | 500 | Unburnt | TLU000-TLU500 | 166 | Slope |
| 14 | 1988 | 2 | 90 | Burnt | TLT000-TLT090 | 171 | Slope |
| 14 | 1988 and 2019 | 3 | 110 | Burnt | TLT100-TLT200 | 171 | Slope |
| 14 | 1988 | 4 | 120 | Burnt | TLB000-TLB120 | 183 | Slope |
| 14 | 1988,1996 and 2019 | 6 | 250 | Burnt | TLB130-TLB380 | 183 | Slope |
| 14 | 1988 and 1996 | 5 | 110 | Burnt | TLB390-TLB500 | 283 | Slope |
| 13 | 1999 | 1 | 500 | Burnt | TLU000-TLU500 | 272 | Plateau |
| 13 | 1999 and 2006 | 2 | 200 | Burnt | TLT000-TLT200 | 266 | Plateau |
| 13 | 1999 and 2006 | 3 | 500 | Burnt | TLB000-TLB500 | 255 | Plateau |
| 27 | NA | 1 | 480 | Unburnt | TLU000-TLU480 | 330 | Plateau |
| 27 | 2021 | 2 | 100 | Burnt | TLT000-TLT100 | 330 | Plateau |
| 27 | 2021 | 3 | 500 | Burnt | TLB000-TLB500 | 330 | Plateau |

**Table S2** Number of fires, the minimum interval between two fires, the number of years since the last fire occurred at each site, and the abundance of each lemur species calculated per 100 m for each partition in all sites. The sites are sorted by the date of site visit, from the oldest to the most recent*. P.c.: Propithecus coquereli, E.m.: Eulemur mongoz, E.f.: E. fulvus, A.o.: Avahi occidentalis, L.e.: Lepilemur edwardsi, C.m.: Cheirogaleus medius, M.m.: Microcebus murinus, M.r.: M. ravelobensis,* NA: not available due to hibernation period of *C. medius*

| Site  No. | Transect zone | Number of fires | Minimum interval between two fires (years) | Number of years since the last fire | *Abundance P. c./100 m* | *Abundance E. m./100 m* | *Abundance E. f./100 m* | *Abundance L. e./100 m* | *Abundance A. o./100 m* | *Abundance C. m./100 m* | *Abundance M. r./100 m* | *Abundance M. m./100 m* |
| --- | --- | --- | --- | --- | --- | --- | --- | --- | --- | --- | --- | --- |
| 1 | Unburnt | 0 | NA | NA | 0.333 | 0 | 0 | 0.733 | 0.467 | 0 | 0.267 | 0.133 |
| 1 | Burnt | 1 | NA | 1 | 0.166 | 0 | 0 | 2.167 | 0.833 | 0 | 0.167 | 0.5 |
| 1 | Burnt | 1 | NA | 1 | 0 | 0 | 0 | 0.267 | 0 | 0 | 0.333 | 0.267 |
| 9 | Unburnt | 0 | NA | NA | 0 | 0 | 0 | 0 | 0 | 0 | 0.533 | 0.4 |
| 9 | Burnt | 1 | NA | 22 | 0 | 0 | 0 | 0 | 0 | 0 | 0 | 0 |
| 9 | Burnt | 1 | NA | 22 | 0 | 0 | 0 | 0 | 0 | 0 | 0 | 1.067 |
| 4 | Burnt | 6 | 1 | 23 | 0 | 0 | 0.303 | 0 | 0 | 0.606 | 1.212 | 0 |
| 4 | Burnt | 5 | 1 | 23 | 0 | 0 | 0 | 0 | 0 | 0 | 0.333 | 0 |
| 4 | Burnt | 4 | 3 | 24 | 0 | 0 | 0 | 0 | 0 | 0 | 1.190 | 0 |
| 4 | Burnt | 3 | 3 | 27 | 0 | 0 | 1.556 | 0 | 0 | 0 | 0.889 | 0 |
| 4 | Burnt | 5 | 3 | 5 | 0 | 0 | 0 | 0 | 0 | 0 | 1.333 | 0 |
| 4 | Burnt | 6 | 1 | 5 | 0 | 0 | 0 | 0 | 0 | 0 | 1.333 | 0 |
| 4 | Burnt | 5 | 3 | 5 | 0 | 0 | 0 | 0 | 0 | 0.074 | 1.556 | 0 |
| 5 | Burnt | 3 | 10 | 5 | 0 | 0 | 0 | 0 | 2.778 | 0 | 0.556 | 0 |
| 5 | Burnt | 2 | 10 | 24 | 0 | 0 | 0 | 0.139 | 0.417 | 0.278 | 1.111 | 0 |
| 5 | Burnt | 2 | 19 | 5 | 0 | 0 | 0 | 0 | 0 | 0.167 | 0.500 | 0.500 |
| 5 | Burnt | 3 | 10 | 5 | 0 | 0 | 0 | 0 | 0 | 0 | 0 | 2.222 |
| 5 | Burnt | 2 | 19 | 5 | 0 | 0 | 0 | 0 | 0.213 | 0.071 | 0.142 | 0.496 |
| 8 | Unburnt | 0 | NA | NA | 0.466 | 0 | 1.133 | 0.8 | 0 | 0.333 | 0.133 | 0.067 |
| 8 | Burnt | 5 | 4 | 5 | 0 | 0 | 0 | 0 | 0 | 0 | 0.667 | 0.167 |
| 8 | Burnt | 5 | 4 | 5 | 0 | 0 | 0 | 0 | 0 | 0 | 0.167 | 0 |
| 8 | Burnt | 4 | 4 | 5 | 0 | 0 | 0 | 0 | 0 | 0 | 0.222 | 0 |
| 11 | Unburnt | 0 | NA | NA | 0.333 | 0 | 0.467 | 0.267 | 0 | 0 | 1.267 | 0 |
| 11 | Burnt | 2 | 3 | 24 | 0 | 0 | 0 | 0 | 0 | 0 | 1.167 | 0 |
| 11 | Burnt | 2 | 3 | 24 | 0 | 0 | 0 | 0 | 0 | 0 | 0.533 | 0 |
| 15 | Burnt | 1 | NA | 35 | 0 | 0 | 3.667 | 0.133 | 0.133 | NA | 0.4 | 0 |
| 15 | Burnt | 2 | 4 | 31 | 0 | 0 | 0.833 | 0 | 0 | NA | 1.333 | 1.333 |
| 15 | Burnt | 2 | 4 | 31 | 0 | 0 | 1.133 | 0 | 0 | NA | 0.867 | 0.200 |
| 6 | Unburnt | 0 | NA | NA | 0 | 0 | 0 | 0.2 | 0.333 | NA | 0.200 | 0.667 |
| 6 | Burnt | 2 | 20 | 5 | 0 | 0 | 0 | 0.167 | 0.500 | NA | 0.167 | 1.5 |
| 6 | Burnt | 2 | 20 | 5 | 0 | 0 | 0 | 0.606 | 0 | NA | 0 | 0.505 |
| 6 | Burnt | 3 | 12 | 5 | 0 | 0 | 0 | 0 | 0 | NA | 0.588 | 0.196 |
| 12 | Unburnt | 0 | NA | NA | 0 | 0 | 0 | 0 | 0 | NA | 0.417 | 0 |
| 12 | Burnt | 1 | NA | >35 | 0 | 0 | 0 | 0 | 0.294 | NA | 0.490 | 0.588 |
| 12 | Burnt | 2 | 12 | 25 | 0 | 0 | 0 | 0 | 0 | NA | 0.667 | 0 |
| 12 | Burnt | 2 | 12 | 25 | 0 | 0 | 0 | 0 | 0 | NA | 0.933 | 0.2 |
| 2 | Burnt | 1 | NA | 24 | 0 | 0.2 | 0.533 | 0 | 0.200 | NA | 0.800 | 0 |
| 2 | Burnt | 2 | 11 | 24 | 0 | 0 | 0 | 0 | 0 | NA | 0.167 | 0.167 |
| 2 | Burnt | 2 | 11 | 24 | 0 | 0.266 | 0.667 | 0 | 0 | NA | 0.800 | 0.267 |
| 19 | Unburnt | 0 | NA | NA | 0 | 0 | 0 | 0.267 | 0.133 | NA | 0.467 | 0.667 |
| 19 | Unburnt | 0 | NA | NA | 0 | 0 | 0 | 0 | 0 | NA | 0.333 | 1 |
| 19 | Burnt | 1 | NA | >35 | 0 | 0 | 0 | 0 | 0 | NA | 1.067 | 0.2 |
| 21 | Unburnt | 0 | NA | NA | 0 | 0 | 0 | 0.333 | 0.200 | NA | 1.000 | 0.2 |
| 21 | Burnt | 1 | NA | 7 | 0 | 0 | 0 | 0 | 0 | NA | 0.167 | 0 |
| 21 | Burnt | 1 | NA | 7 | 0 | 0 | 0 | 0 | 0 | NA | 0.933 | 0.333 |
| 30 | Unburnt | 0 | NA | NA | 0 | 0 | 0 | 0.067 | 0.333 | 0 | 0.933 | 0.333 |
| 30 | Burnt | 1 | NA | 6 | 0 | 0 | 0 | 0 | 0 | 0 | 0 | 0 |
| 30 | Burnt | 1 | NA | 6 | 0 | 0 | 0 | 0 | 0.133 | 0.067 | 0.067 | 0.067 |
| 24 | Unburnt | 0 | NA | NA | 0 | 0 | 0 | 0.067 | 0.133 | 0.133 | 0.533 | 0 |
| 24 | Burnt | 2 | 24 | 1 | 0 | 0 | 0 | 0 | 0 | 0 | 0.833 | 0 |
| 24 | Burnt | 2 | 24 | 1 | 0 | 0 | 0 | 0 | 0 | 0 | 0.8 | 0 |
| 16 | Unburnt | 0 | NA | NA | 0 | 0 | 0.333 | 0.2 | 0.333 | 0.267 | 1.067 | 0.133 |
| 16 | Burnt | 1 | NA | 35 | 0 | 0 | 0 | 0.167 | 0 | 0 | 0.833 | 0.5 |
| 16 | Burnt | 1 | NA | 35 | 0 | 0 | 0 | 0 | 0.133 | 0 | 0.2 | 0.6 |
| 14 | Unburnt | 0 | NA | NA | 0 | 0 | 0 | 0.733 | 0.467 | 0.200 | 0.400 | 0.467 |
| 14 | Burnt | 1 | NA | 35 | 0 | 0 | 0 | 0.370 | 0 | 0.370 | 0.370 | 0.370 |
| 14 | Burnt | 2 | 31 | 4 | 0 | 0 | 0 | 1.212 | 0 | 0 | 1.212 | 0.606 |
| 14 | Burnt | 1 | NA | 35 | 0 | 0 | 0 | 0.278 | 0 | 0.556 | 0.833 | 0.278 |
| 14 | Burnt | 2 | 8 | 27 | 0 | 0 | 0 | 0.303 | 0.909 | 0 | 0.606 | 1.212 |
| 14 | Burnt | 3 | 8 | 4 | 0 | 0 | 0 | 0.133 | 0 | 0 | 0.667 | 0.133 |
| 13 | Burnt | 1 | NA | 24 | 0.533 | 0 | 0.2 | 0.333 | 0 | 0.200 | 0.200 | 0.467 |
| 13 | Burnt | 2 | 7 | 17 | 0 | 0 | 0 | 0 | 0 | 0 | 0.167 | 0.333 |
| 13 | Burnt | 2 | 7 | 17 | 0 | 0 | 0 | 0 | 0 | 0.067 | 0.133 | 0.267 |
| 27 | Unburnt | 0 | NA | NA | 0 | 0 | 0.347 | 0 | 0.139 | 0.139 | 0.486 | 0.069 |
| 27 | Burnt | 1 | NA | 2 | 0 | 0 | 0 | 0 | 0 | 0 | 0.667 | 0 |
| 27 | Burnt | 1 | NA | 2 | 0 | 0 | 0 | 0 | 0 | 0.067 | 0.400 | 0 |

**Table S3** Results of Generalized Linear Mixed Models (GLMMs) using the package glmmTMB to test for relationships between species abundance or lemur species richness and the two topographic variables. Type of data transformation is indicated for all dependent variables. In bold: significant results even after correction for multiple testing. The necessary logarithmic or square root transformation for each variable is denoted as (log) or (sqrt), respectively.

| Models | Random factors | Fixed factors | Estimate | Standard error | Z*-*value | P*-*value | Correction Holm-Bonferroni | |
| --- | --- | --- | --- | --- | --- | --- | --- | --- |
| **Adjusted alpha** | **Significant** |
| *Abundance of*  *E. fulvus*  *(sqrt)* | Site and Month | Intercept | -2.584 | 0.550 | -4.698 | < 0.0001*** |  |  |
| Terrainslope | -0.462 | 1.281 | -0.361 | 0.718 | 0.050 | False |
| Terrainvalley | 2.354 | 0.882 | 2.669 | **0.007**** | **0.016** | **True** |
| Intercept | 6.987 | 3.988 | 1.752 | 0.079 |  |  |
| Elevation *(log)* | -1.807 | 0.806 | -2.241 | **0.025 *** | **0.025** | **True** |
| *Abundance of*  *L. edwardsi*  *(sqrt)* | Site and Month | Intercept | -1.920 | 0.373 | -5.137 | < 0.0001*** |  |  |
| Terrainslope | 0.765 | 0.654 | 1.170 | 0.242 | 0.016 | False |
| Terrainvalley | -0.872 | 0.898 | -0.971 | 0.331 | 0.025 | False |
| Intercept | -1.606 | 0.390 | -4.114 | 3.9e-05 *** |  |  |
| Elevation *(sqrt)* | -0.072 | 0.045 | -1.608 | 0.927 | 0.050 | False |
| *Abundance of*   1. *occidentalis*   *(sqrt)* | Site and Month | Intercept | -1.525 | 0.240 | -6.332 | < 0.0001*** |  |  |
| Terrainslope | 0.074 | 0.514 | 0.146 | 0.884 | 0.050 | False |
| Terrainvalley | 0.074 | 0.514 | 0.146 | 0.077 | 0.016 | False |
| Intercept | -3.569 | 2.808 | -1.271 | 0.204 |  |  |
| Elevation *(log)* | 0.332 | 0.523 | 0.636 | 0.525 | 0.025 | False |
| *Abundance of*  *C. medius*  *(sqrt)* | Site and Month | Intercept | -1.900 | 0.327 | -5.803 | < 0.0001*** |  |  |
| Terrainslope | 0.342 | 0.533 | 0.642 | 0.521 | 0.016 | False |
| Terrainvalley | -0.353 | 0.691 | -0.511 | 0.610 | 0.025 | False |
| Intercept | -1.835 | 2.463 | -0.745 | 0.456 |  |  |
| Elevation *(log)* | -0.006 | 0.482 | -0.013 | 0.989 | 0.050 | False |
| *Abundance of*  *M. murinus*  *(sqrt)* | Site and Month | Intercept | -0.866 | 0.163 | -5.302 | < 0.0001*** |  |  |
| Terrainslope | 0.320 | 0.303 | 1.058 | 0.290 | 0.025 | False |
| Terrainvalley | -1.221 | 0.633 | -1.929 | 0.053 | 0.016 | False |
| Intercept | -3.768 | 2.043 | -1.844 | 0.065 |  |  |
| Elevation *(sqrt)* | 0.512 | 0.381 | 1.344 | 0.179 | 0.050 | False |
| *Abundance of*  *M. ravelobensis* | Site and Month | Intercept | -0.810 | 0.104 | -7.772 | < 0.0001*** |  |  |
| Terrainslope | 0.317 | 0.204 | 1.554 | 0.120 | 0.050 | False |
| Terrainvalley | 0.841 | 0.164 | 5.120 | **< 0.0001***** | **0.016** | **True** |
| Intercept | 0.246 | 0.478 | 0.515 | 0.607 |  |  |
| Elevation *(sqrt)* | -0.063 | 0.030 | -2.087 | 0.036 | 0.025 | False |
| *Lemur species richness* | Site and Transect length | Intercept | -0.338 | 0.220 | -1.537 | 0.124 |  |  |
| Terrainslope | 0.394 | 0.345 | 1.141 | 0.254 | 0.025 | False |
| Terrainvalley | -0.385 | 0.334 | -1.15 | 0.249 | 0.016 | False |
| Intercept | -0.735 | 1.507 | -0.488 | 0.626 |  |  |
| Elevation *(log)* | 0.073 | 0.288 | 0.254 | 0.799 | 0.050 | False |

**Table S4** Results of Generalized Linear Mixed Models (GLMMs) using the package glmmTMB to test for relationships between species abundances or lemur species richness and the fire-related variables. In bold: significant results even after correction for multiple testing. Logarithm and square root transformations for each variable are denoted as (*log*) and (*sqrt*)*,* respectively

| Models | Random factors | Fixed factors | Estimate | Standard error | Z*-*value | P*-*value | Correction Holm-Bonferroni | |
| --- | --- | --- | --- | --- | --- | --- | --- | --- |
| **Adjusted alpha** | **Significant** |
| *Abundance of*  *E. fulvus*  *(sqrt)* | Site and Month | Intercept | -4.012 | 1.208 | -3.321 | 0.0008*** |  |  |
| Unburnt zone | 1.792 | 1.038 | 1.726 | 0.084 | 0.025 | False |
| Intercept | -1.838 | 0.758 | -2.423 | 0.015* |  |  |
| Number of fires *(sqrt)* | -1.267 | 0.621 | -2.041 | 0.041* | 0.010 | False |
| Intercept | -6.201 | 2.501 | -2.479 | 0.013* |  |  |
| Years since the last fire | 0.133 | 0.068 | 1.949 | 0.051 | 0.012 | False |
| Intercept | -4.092 | 1.037 | -3.945 | < 0.0001*** |  |  |
| Minimum intervals between two fires | 0.079 | 0.051 | 1.541 | 0.123 | 0.016 | False |
| Intercept | -2.097 | 1.629 | -1.288 | 0.198 |  |  |
| Maximum fire severity | -14.879 | 11.688 | -1.273 | 0.203 | 0.050 | False |
| *Abundance of*  *L. edwardsi*  *(sqrt)* | Site and Month | Intercept | -3.157 | 0.438 | -7.203 | < 0.0001*** |  |  |
| Unburnt zone | 0.930 | 0.398 | 2.337 | **0.019*** | **0.025** | **True** |
| Intercept | -1.180 | 0.397 | -2.967 | 0.003** |  |  |
| Number of fires *(log)* | -1.131 | 0.381 | -2.967 | **0.003**** | **0.010** | **True** |
| Intercept | -2.062 | 0.878 | -2.349 | 0.018* |  |  |
| Years since the last fire *(sqrt)* | -0.015 | 0.192 | -0.083 | 0.934 | 0.050 | False |
| Intercept | -3.770 | 1.353 | -2.786 | 0.005** |  |  |
| Minimum intervals between two fires *(log)* | 1.113 | 0.444 | 2.504 | **0.012*** | **0.012** | **True** |
| Intercept | -0.947 | 0.849 | -1.116 | 0.264 |  |  |
| Maximum fire severity *(log)* | -21.338 | 8.520 | -2.504 | **0.012*** | **0.016** | **True** |
| *Abundance of*  *A. occidentalis*  *(sqrt)* | Site and Month | Intercept | -2.055 | 0.334 | -6.143 | < 0.0001*** |  |  |
| Unburnt zone | 0.947 | 0.462 | 2.049 | 0.040* | 0.012 | False |
| Intercept | -1.200 | 0.370 | -3.239 | 0.001** |  |  |
| Number of fires *(log)* | -0.909 | 0.433 | -2.097 | 0.036* | 0.010 | False |
| Intercept | -2.062 | 0.878 | -2.349 | 0.018* |  |  |
| Years since the last fire *(sqrt)* | -0.015 | 0.192 | -0.083 | 0.934 | 0.050 | False |
| Intercept | -3.976 | 1.809 | -2.197 | 0.028* |  |  |
| Minimum intervals between two fires *(log)* | 0.719 | 0.775 | 0.927 | 0.354 | 0.025 | False |
| Intercept | -0.965 | 1.256 | -0.768 | 0.442 |  |  |
| Maximum fire severity *(sqrt)* | -4.404 | 4.306 | -1.023 | 0.306 | 0.016 | False |
| *Abundance of*  *C. medius*  *(sqrt)* | Site and Month | Intercept | -2.0365 | 0.285 | -7.124 | < 0.0001*** |  |  |
| Unburnt zone | 0.662 | 0.514 | 1.290 | 0.197 | 0.025 | False |
| Intercept | -1.417 | 0.381 | -3.716 | 0.0002*** |  |  |
| Number of fires *(log)* | -0.541 | 0.397 | -1.362 | 0.173 | 0.016 | False |
| Intercept | -3.408 | 0.789 | -4.317 | < 0.0001*** |  |  |
| Years since the last fire *(sqrt)* | 0.358 | 0.175 | 2.043 | 0.041* | 0.010 | False |
| Intercept | -2.065 | 0.981 | -2.104 | 0.035* |  |  |
| Minimum intervals between two fires *(log)* | -0.099 | 0.477 | -0.210 | 0.834 | 0.050 | False |
| Intercept | -0.633 | 0.837 | -0.757 | 0.449 |  |  |
| Maximum fire severity *(sqrt)* | -5.153 | 3.085 | -1.670 | 0.094 | 0.012 | False |
| *Abundance of*  *M. murinus*  *(sqrt)* | Site and Month | Intercept | -1.048 | 0.216 | -4.854 | < 0.0001*** |  |  |
| Unburnt zone | 0.124 | 0.312 | 0.399 | 0.690 | 0.050 | False |
| Intercept | -0.752 | 0.259 | -2.905 | 0.003** |  |  |
| Number of fires | -0.167 | 0.120 | -1.392 | 0.163 | 0.016 | False |
| Intercept | -1.162 | 0.335 | -3.466 | 0.0005*** |  |  |
| Years since the last fire | 0.009 | 0.015 | 0.652 | 0.514 | 0.025 | False |
| Intercept | -2.590 | 0.930 | -2.785 | 0.005** |  |  |
| Minimum intervals between two fires *(log)* | 0.681 | 0.377 | 1.805 | 0.071 | 0.010 | False |
| Intercept | -0.426 | 0.444 | -0.958 | 0.338 |  |  |
| Maximum fire severity | -6.913 | 4.750 | -1.455 | 0.146 | 0.012 | False |
| *Abundance of*  *M. ravelobensis*  *(sqrt)* | Site and Month | Intercept | -0.308 | 0.062 | -4.931 | < 0.0001*** |  |  |
| Unburnt zone | -0.017 | 0.099 | -0.174 | 0.862 | 0.025 | False |
| Intercept | -0.387 | 0.074 | -5.235 | < 0.0001*** |  |  |
| Number of fires | 0.047 | 0.030 | 0.552 | 0.121 | 0.010 | False |
| Intercept | -0.373 | 0.133 | -2.805 | 0.005** |  |  |
| Years since the last fire *(sqrt)* | 0.012 | 0.033 | 0.384 | 0.700 | 0.016 | False |
| Intercept | -0.245 | 0.120 | -2.045 | 0.040* |  |  |
| Minimum intervals between two fires | -0.000 | 0.008 | -0.115 | 0.908 | 0.050 | False |
| Intercept | -0.261 | 0.375 | -0.697 | 0.486 |  |  |
| Maximum fire severity *(sqrt)* | -0.587 | 1.200 | -0.490 | 0.624 | 0.012 | False |
| *Lemur species richness* | Site and Month | Intercept | -0.504 | 0.207 | -2.429 | 0.015* |  |  |
| Unburnt zone | 1.140 | 0.314 | 3.632 | **< 0.0001***** | **0.012** | **True** |
| Intercept | 0.761 | 0.304 | 2.501 | 0.012* |  |  |
| Number of fires *(log)* | -1.175 | 0.292 | -4.020 | **< 0.0001***** | **0.010** | **True** |
| Intercept | -1.064 | 0.372 | -2.857 | 0.004** |  |  |
| Years since the last fire *(sqrt)* | 0.172 | 0.090 | 1.893 | 0.058 | 0.025 | False |
| Intercept | -1.214 | 0.448 | -2.708 | 0.006** |  |  |
| Minimum intervals between two fires *(log)* | 0.289 | 0.198 | 1.462 | 0.143 | 0.050 | False |
| Intercept | 0.591 | 0.577 | 1.026 | 0.305 |  |  |
| Maximum fire severity (sqrt) | -3.583 | 1.866 | -1.920 | 0.054 | 0.016 | False |

**Table S5** Result of the Post-hoc Tukey test for the variable terrain performed for *Eulemur fulvus* and *Microcebus ravelobensis.* In bold: significant results

| Models | Pairwise comparisons | Estimate | Standard error | Z-ratio | P-value |
| --- | --- | --- | --- | --- | --- |
| *Eulemur fulvus* | Plateau-slope | 0.657 | 1.484 | 0.443 | 0.897 |
| Plateau-valley | -2.354 | 0.882 | -2.669 | **0.020*** |
| Slope-valley | -3.011 | 1.516 | -1.986 | 0.115 |
| *Microcebus ravelobensis* | Plateau-slope | -0.318 | 0.204 | -1.554 | 0.265 |
| Plateau-valley | -0.842 | 0.164 | -5.120 | **< 0.0001***** |
| Slope-valley | -0.524 | 0.217 | -2.414 | **0.0418*** |
